# Supplementary material for: Determination of the Youngest Active Domain in Major Fault Zones Using Medical X-ray Computed Tomography-derived Density Estimations
Source: Research Square preprint supplement (doi:10.21203/rs.3.rs-342540/v1), 2021-04-01
Supplement: Supplementary file 1 [file 68a97066e8fc8f48ec52adea.docx]

Table 6. Statistics of the determined *N*CTM values and rock/protolith ratios (*ρ*t and *Z*et3.8).
